# Supplementary material for: Antimicrobial and Antivirulence Potential of Fungal Bioactive Metabolites against Gram-Positive Bacteria
Source: Research Square preprint supplement (doi:10.21203/rs.3.rs-7771244/v1), 2025-11-07
Supplement: Supplementary file 1 [file ba4eb0cf3dc2c8554a56b0e8.docx]

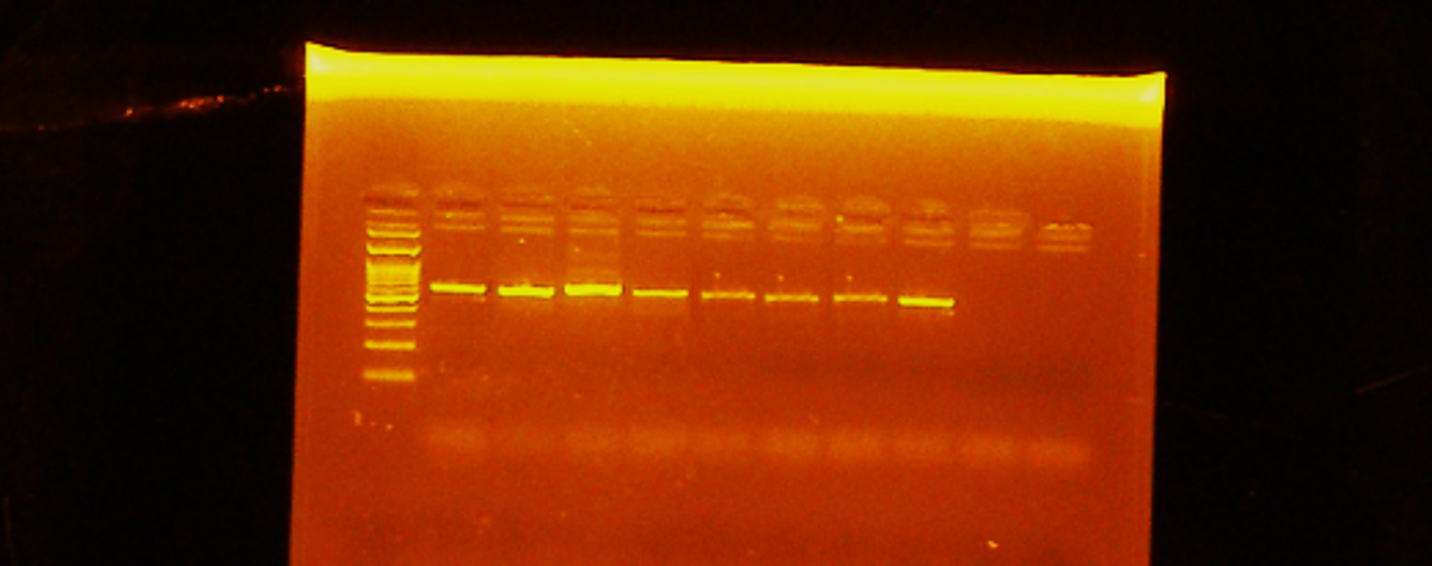


The non-cropped block corresponding to Figure 3.

Agarose gel electrophoresis of the ITS1/ITS4 rDNA PCR products. Lanes 1-8 were representation of *Cladosporium* strains. M is the 100 bp molecular size marker, and lanes 9 and 10 are negative controls
